# Supplementary material for: Communicating Unexpected News in the Fetal Medicine setting: Experiences of Pregnant Individuals with Mental Health Conditions (The UNDERSTAND study)
Source: Research Square preprint supplement (doi:10.21203/rs.3.rs-7871926/v1), 2025-11-18
Supplement: Supplementary file 1 [file e0c00c5d19f2df2bedf9af87.docx]

Additional File 1

# Inclusion/Exclusion Criteria

***Inclusion criteria for service users in WP2***

Age > 16 years

Capacity to consent to taking part in the study

AND

History of previous pregnancy with complications requiring referral to a fetal medicine unit. (e.g. structural defect, chromosomal or genetic condition, high chance of

304

chromosomal syndrome at combined prenatal screening, intrauterine growth restriction, intrauterine death, abnormal placentation, multiple pregnancies)

AND

Concurrent diagnosis of anxiety, depression, bipolar affective disorder (BAD), post- traumatic stress disorder (PTSD) and psychotic disorders,

AND/OR

Patients’ significant others (any age, any gender, any relationship), can be recruited together or instead of patients upon patients’ preferences

*Patients for WP2 will be considered suitable for recruitment 6 months after a previous pregnancy complicated by unexpected news and 12 months after a pregnancy loss or bereavement.

***Exclusion criteria WP2***

Women less than 16 years of age

Women with a safeguarding order in place

Women that lack the capacity to give consent.

Women without a past history of pregnancy complications requiring referral to a fetal medicine unit

Women without a previous concurrent history of mental health disorders [anxiety, depression, bipolar affective disorder (BAD), post-traumatic stress disorder (PTSD) and psychotic disorders]

Supplementary Table . PARTICIPANTS ‘DEMOGRAPHICS

| Participants’ Demographics | |
| --- | --- |
| Characteristic | **Value** |
| Number of participants (N) | 21 |
| Age in years (Mean) | 39 |
| Ethnicity (%) | White 60%  South-East Asian 20%  Afro-Caribbean 10%  Other 10% |
| Mental Health Condition (N) | Anxiety (5), Anxiety & Depression (5), Depression (4), Bipolar (3), PTSD (3), schizoaffective disorder (1) |
| Fetal condition (N) | SGA/IUGR (6), IUD (3), brain anomalies (2), High risk CST (2) LGA (1), spina bifida (1), tuberous sclerosis (1), gastroschisis (1), CDH (1), PPROM (1), low papp-a (1), skeletal anomalies (1) |
